# Supplementary material
Source: PubMed Central journal article supplement (PMC9852063)
Supplement: NIHMS1840557-supplement-1.pdf [file NIHMS1840557-supplement-1.pdf]

Supplementary Figure 1

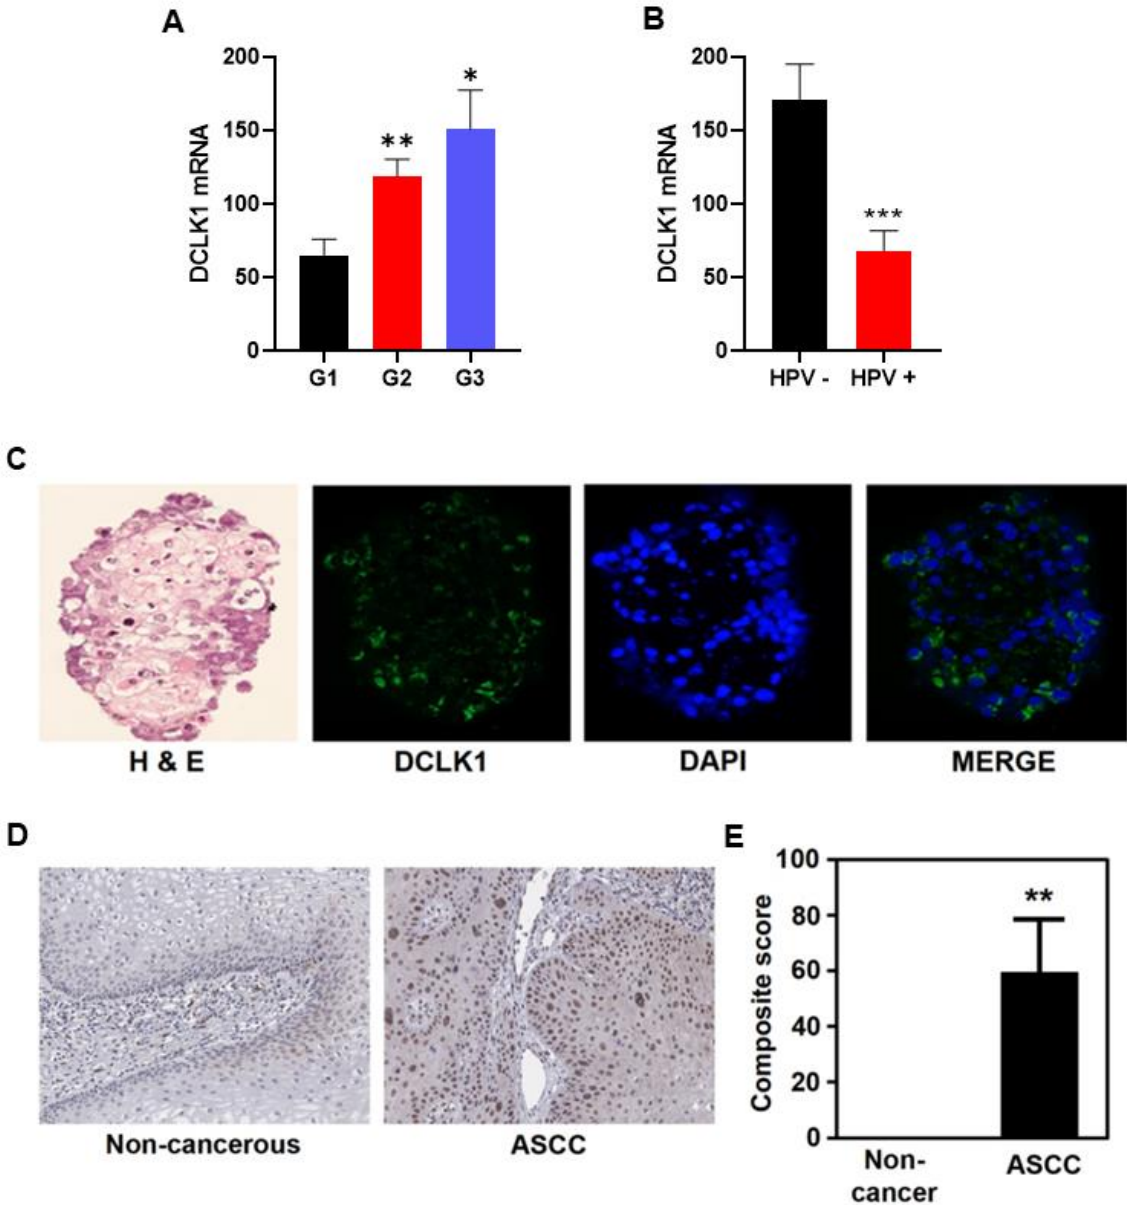

939 **Supplementary Figure 1.** (A) DCLK1 mRNA expression by histological tumor grade  
 940 represented as fragments per kilobase of transcript per million (FPKM) mapped reads,  
 941 obtained through TCGA analysis (G1, n=64; G2, n=312; G3, n=125) (B) DCLK1 mRNA  
 942 expression in HPV negative (n=74) and HPV positive tumors (n=42) represented as  
 943

944 fragments per kilobase of transcript per million (FPKM) mapped reads, obtained  
 945 through TCGA analysis (C) HN5 spheroids stained with H&E, or DCLK1 (green) and  
 946 DAPI (blue). (D) Representative images of DCLK1 staining in non- cancerous anal  
 947 mucosa (n=3) and ASCC (n=14). (E) Cumulative results of composite score (intensity x  
 948 % positivity) of DCLK1 staining in anal mucosa samples. \*p<0.05, \*\*p<0.01, \*\*\*p<0.001  
 949

### Supplementary Figure 2

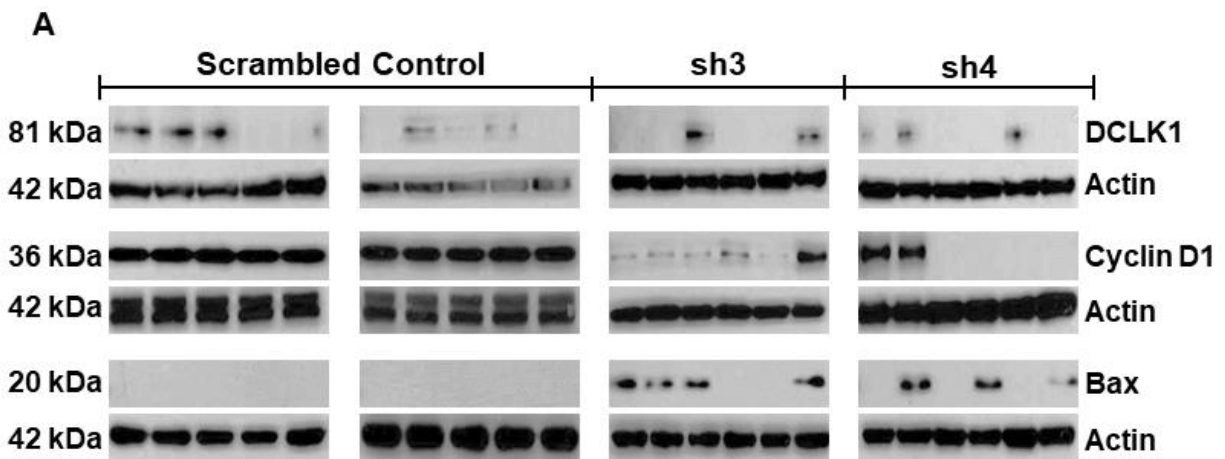

950  
 951 **Supplementary Figure 2.** (A) Western blots from **xenograft** tumor lysates.  $1 \times 10^6$  **FaDu**  
 952 cells stably transfected with shRNA targeting DCLK1-3 (sh3), DCLK1-4 (sh4) or  
 953 scrambled control shRNA were injected subcutaneously into NSG mice.

## Supplementary Figure 3

A

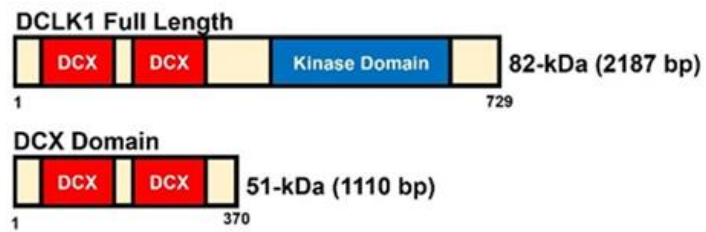

B

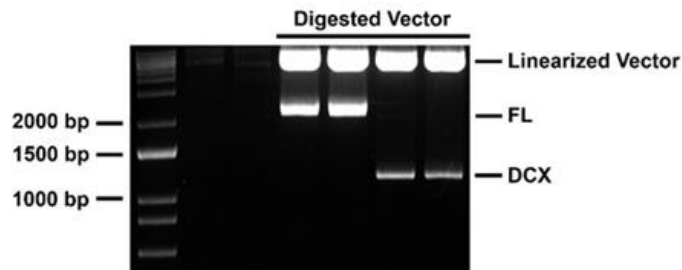

C

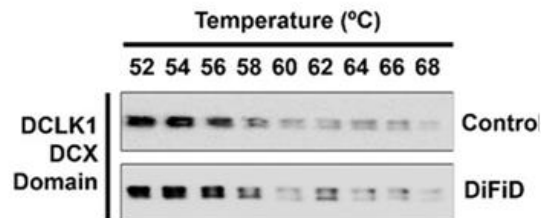

954

955 **Supplementary Figure 3.** (A) Diagram of DCLK1 full length and DCX domain  
 956 fragments. (B) Restriction digested plasmid constructs expressing either full length (FL)  
 957 or DCX domain (DCX) fragments. (C) Western blot analysis of CETSA samples from  
 958 DCX domain expressing FaDu cells treated with DMSO or DiFiD.

Supplementary Figure 4

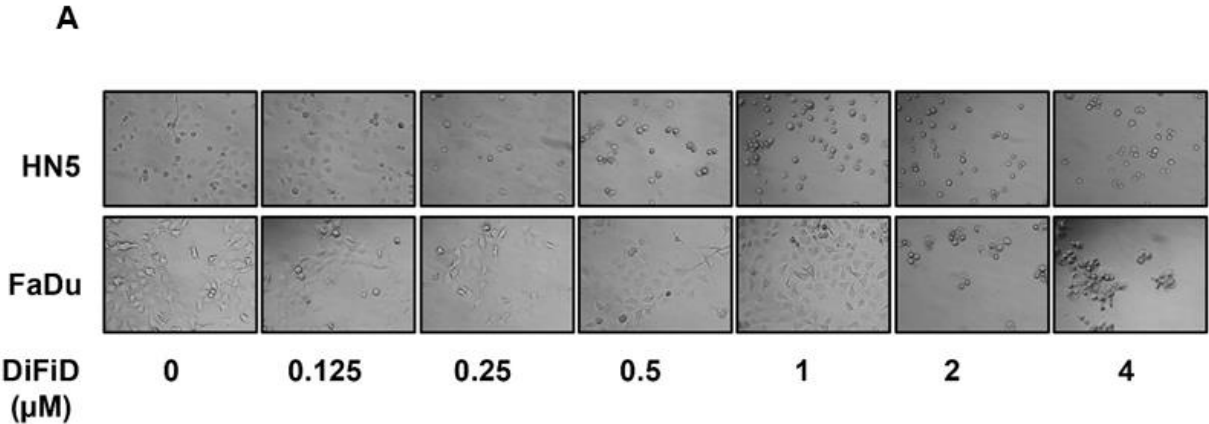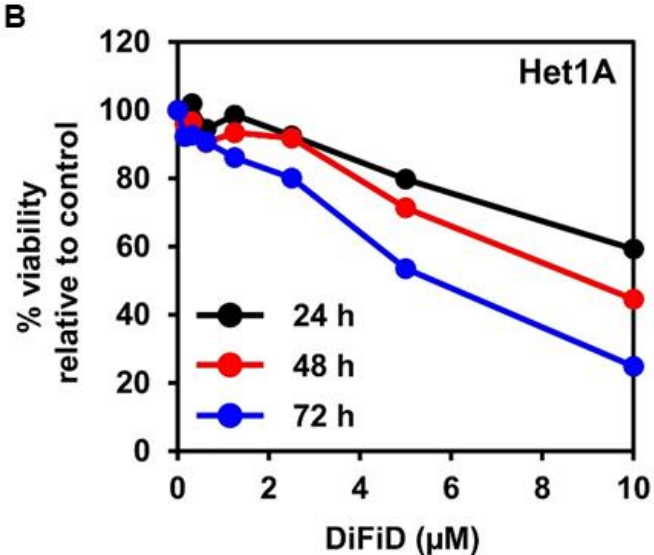

959  
960 **Supplementary Figure 4.** (A) Bright field images of HN5 and FaDu cells at 100X  
961 magnification treated with increasing doses of DiFiD for 48 h. (B) Hexosaminidase  
962 assay for Het1A cells treated with DiFiD for up to 72 hours.

## Supplementary Figure 5

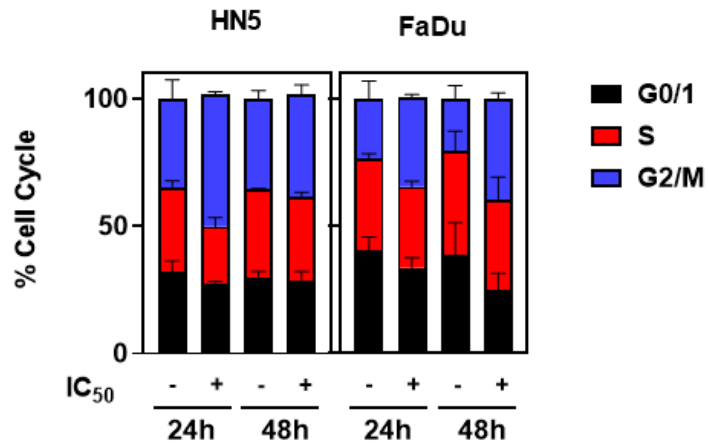

963

964 **Supplementary Figure 5.** Quantification of cell cycle data from three independent

965 experiments with HN5 and FaDu cells treated with DiFiD for 24 h or 48 h.

Supplementary Figure 6

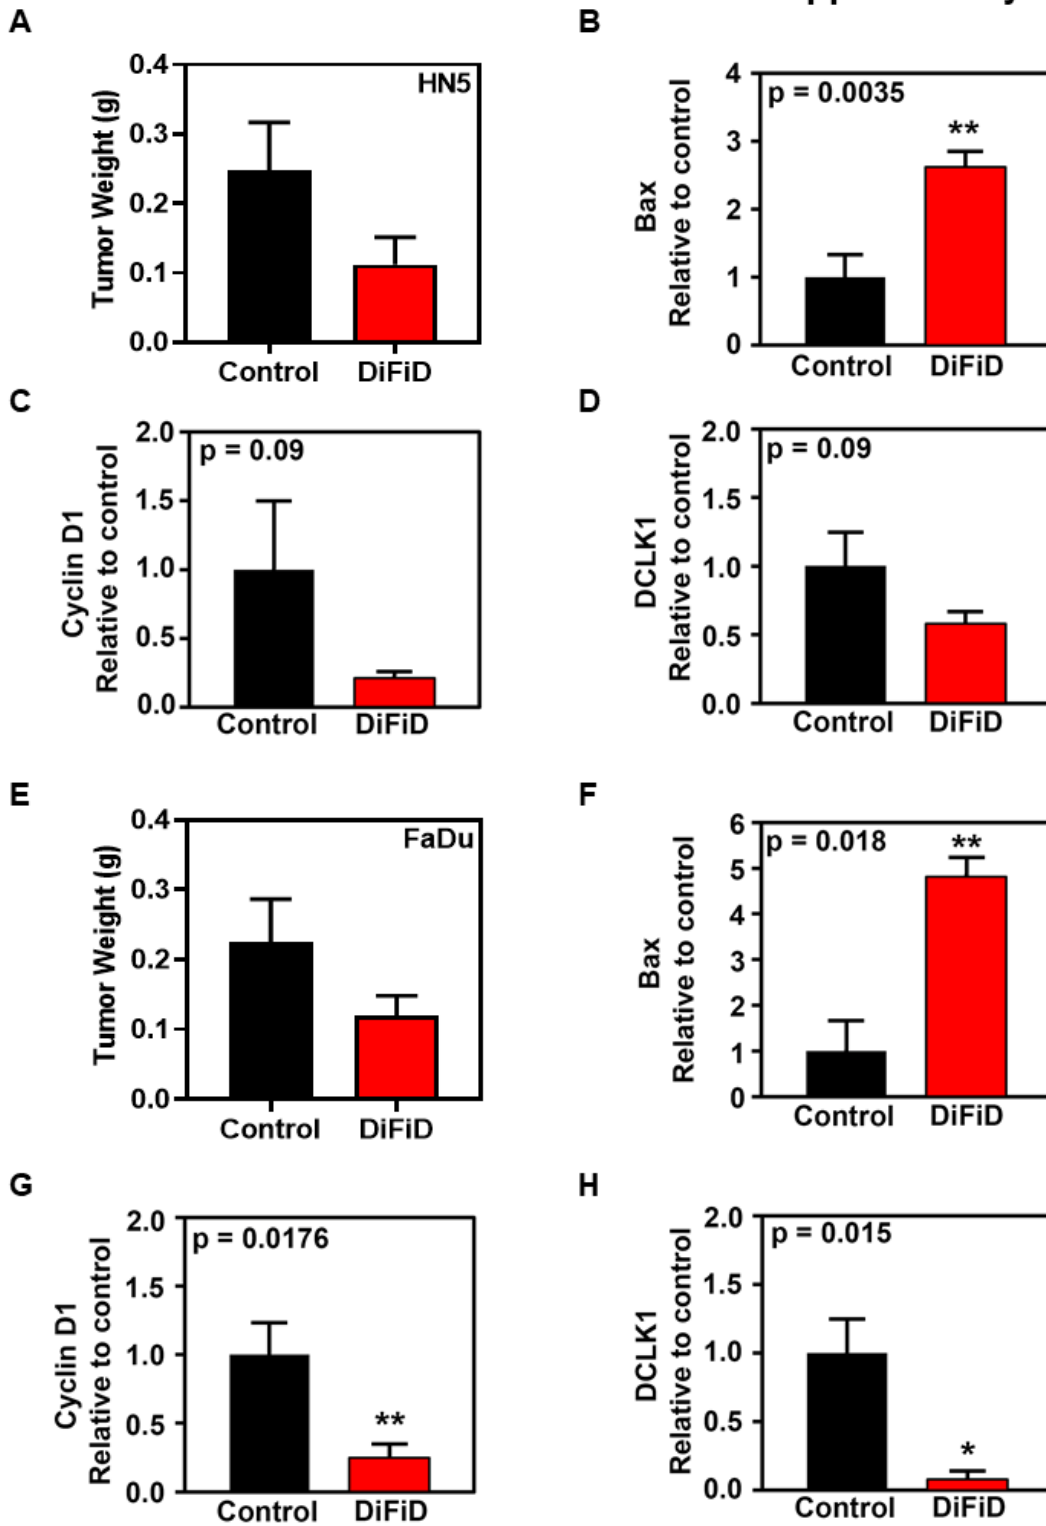

966

967 Supplemental Figure 6.

968 HN5 or FaDu ( $1 \times 10^6$ ) cells were inoculated subcutaneously into the right flank of  
969 athymic *Foxn1<sup>nu/nu</sup>* mice. DiFiD (2 mg/kg) or vehicle control (DMSO) was administered  
970 by intraperitoneal injection once daily for 15 days. HN5 Tumor weight (A) (n=7  
971 mice/group), are depicted. HN5 xenograft tumors were subjected to biomarker  
972 analyses. Densitometric analysis of HN5 xenograft tumors immunoblot signals for (B)  
973 Bax (C) Cyclin D1 (D) DCLK1. (E) FaDu tumor weight (n=10 mice/group).  
974 Densitometric analyses of FaDu tumor signals for (F) Bax (G) Cyclin D1 (H) DCLK1 are  
975 depicted graphically, including  $\pm$  SEM, \*p<0.05.

976
